# Supplementary material for: Blood rheometer based on microflow manipulation of continuous blood flows using push-and-back mechanism
Source: Royal Society of Chemistry journal article supplement (doi:10.1039/d1ay00948f), 2021-01-01

## Supplementary materials

Blood rheometer based on microflow manipulation of continuous blood flows  
using push-and-back mechanism

Yang Jun Kang

Department of Mechanical Engineering, Chosun University, Gwangju, Republic of Korea

\*Address: 309 Pilmun-daero, Dong-gu, Gwangju, South Korea; e-mail: yjkang2011@chosun.ac.kr; Fax: +82-62-230-7055

■ **Figure S1.** Snapshot of a microfluidic device located on the microscopic stage.

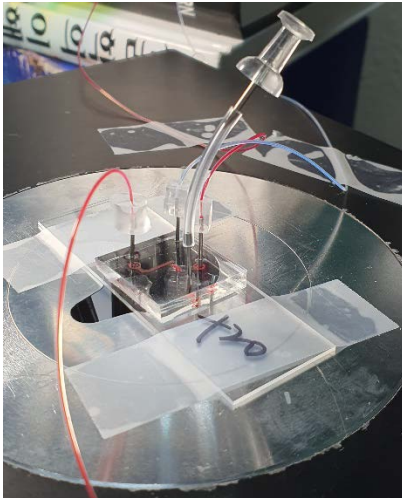

■ **Movie 1.** Movie for control blood (normal RBCs in 1× PBS, Hct=50%)

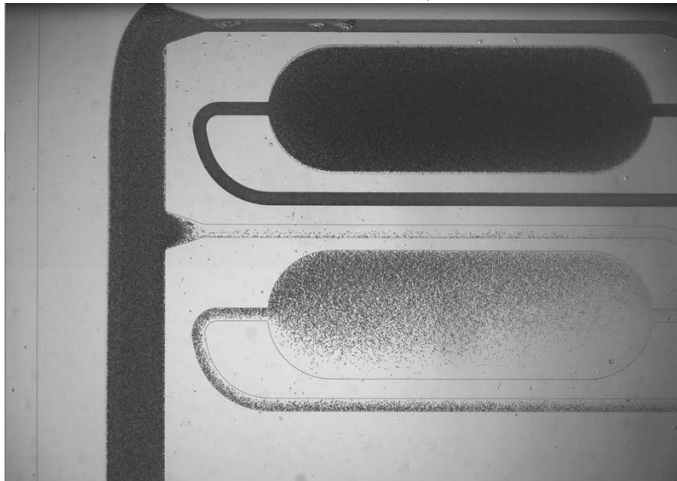

■ **Movie 2.** movie for aggregation-enhanced blood (RBCs suspended in dextran solution [30 mg/mL], Hct=50%)

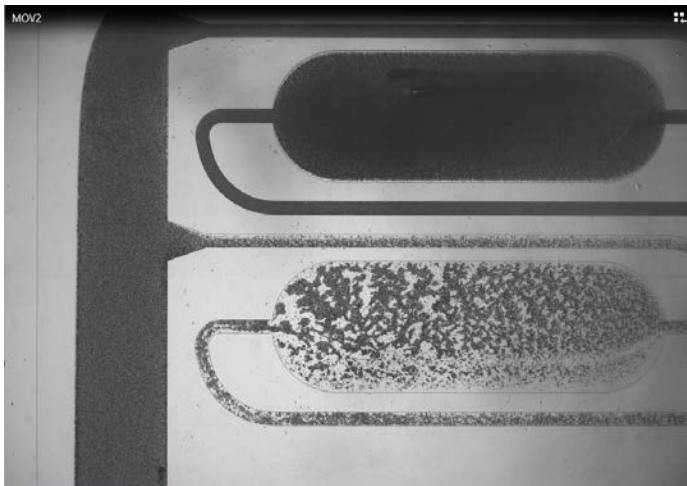

Supplement: d1ay00948f1.pdf [file d1ay00948f1.pdf]
